# Supplementary material for: Fine-Scaled Selection of Resting and Hunting Habitat by Leopard Cats (Prionailurus bengalensis) in a Rural Human-Dominated Landscape in Taiwan
Source: MDPI journal article supplement (doi:10.3390/ani13020234), 2023-01-08

# Fine-scaled selection of resting and hunting habitat by leopard cats (*Prionailurus bengalensis*) in a rural human-dominated landscape in Taiwan

Esther van der Meer<sup>1</sup> ID, Hans Dullemont<sup>1</sup>, Ching-Hao Wang<sup>1</sup>, Jun-Wei Zhang<sup>1</sup>, Jun-Liang Lin<sup>2</sup>, Kurtis Jai-Chyi Pei<sup>1</sup>, Yu-Ching Lai<sup>2\*</sup>

<sup>1</sup>Institute of Wildlife Conservation, College of Veterinary Medicine, National Pingtung University of Science and Technology, Pingtung, Taiwan

<sup>2</sup>Department of Landscape Architecture and Environmental Design, Huaan University, New Taipei City, Taiwan

**Table S1.** Characteristics of the studied leopard cats: sex (M = male, F = female), age, body weight and body score of the studied leopard cats, start and end date of radio-tracking, number of days followed, number of night sessions and reason for termination of the study. Body score is measured on a scale of 1-5, a score of 2.5-3 is considered healthy for domestic cats (Baldwin *et al.*, 2020).

| ID                 | Sex | Age             | Body weight (kg) | Body score | Start tracking | End tracking | Number of days followed | Number of night sessions | Reason termination study  |
|--------------------|-----|-----------------|------------------|------------|----------------|--------------|-------------------------|--------------------------|---------------------------|
| MZM01              | M   | Ad (1-2 yrs.)   | 4.40             | 2          | 15-5-2019      | 20-6-2019    | 38                      | 2                        | Mortality (cause unknown) |
| MZM02              | M   | SA (7-8 months) | 2.93             | 2          | 3-6-2019       | 21-8-2019    | 81                      | 7                        | Mortality (roadkill)      |
| MZF03              | F   | SA (5-6 months) | 1.50             | 3          | 24-7-2019      | 27-7-2019    | 4                       | 0                        | Mortality (domestic dogs) |
| MZF04 <sup>1</sup> | F   | Ad (2-3 yrs.)   | 2.84             | 2          | 22-8-2019      | 8-11-2020    | 445                     | 15                       | Collar battery drained    |
| MZM05              | M   | Ad (2-3 yrs.)   | 3.40             | 2          | 5-10-2019      | 16-12-2019   | 73                      | 5                        | Mortality (domestic dogs) |
| MZF06 <sup>2</sup> | F   | Ad (3-4 yrs.)   | 2.68             | 2          | 17-3-2020      | 4-6- 2021    | 445                     | 11                       | Collar battery drained    |
| MZM07              | M   | Ad (2-3 yrs.)   | 3.77             | 2-2.5      | 6-4-2020       | 1-4-2021     | 361                     | 7                        | Collar drop-off           |
| MZM08              | M   | Ad (4-5 yrs.)   | 4.00             | 3-3.5      | 11-5-2020      | 17-7-2021    | 433                     | 8                        | Collar battery drained    |

<sup>1</sup>Maternal period - 2019: No litter, 2020: 23<sup>rd</sup> of July-8<sup>th</sup> of November (study terminated prior to dispersal kittens)

<sup>2</sup>Maternal period - 2020: 16<sup>th</sup> of July-2<sup>nd</sup> of August (litter failed), 2021: 3<sup>rd</sup> of April-4<sup>th</sup> of June (study terminated prior to dispersal kittens)

Baldwin, K.; Bartgens, J.; Buffington, J.; Freeman, L.M.; Grabow, M.; Legred, J.; Ostwald Jr, D. AAHA nutritional assessment guidelines for dogs and cats. *J. Am. Anim. Hosp. Assoc.* **2010**, *46*, 285–296. Available online: <https://www.aaha.org/globalassets/02-guidelines/nutritional-assessment/nutritionalassessmentguidelines.pdf> (accessed 21 December 2022)

**Table S2.** Mean proportions of vegetation and other ground cover types for land use subclasses at leopard cat daytime resting sites and random points, only including vegetation and other ground cover types for which total sample size of random points and/or resting sites was > 5.

|                   |                   |      | Trees | Shrub | Bamboo | Reed | Grass | Herbs | Stones | Bare | River blocks | Building | Tar road | Dirt road | Other |
|-------------------|-------------------|------|-------|-------|--------|------|-------|-------|--------|------|--------------|----------|----------|-----------|-------|
| Abandoned orchard | All               | Mean | 0.24  | 0.07  | 0.02   | 0.18 | 0.04  | 0.42  | 0      | 0.04 | 0            | 0        | 0        | 0         | 0     |
|                   | ( <i>n</i> = 80)  | SE   | 0.02  | 0.01  | 0.01   | 0.02 | 0.02  | 0.03  | 0      | 0.01 | 0            | 0        | 0        | 0         | 0     |
|                   | Random            | Mean | 0.23  | 0.01  | 0.01   | 0.08 | 0.17  | 0.48  | 0      | 0.02 | 0            | 0        | 0        | 0         | 0     |
|                   | ( <i>n</i> = 15)  | SE   | 0.06  | 0.01  | 0.01   | 0.04 | 0.08  | 0.09  | 0      | 0.01 | 0            | 0        | 0        | 0         | 0     |
|                   | Rest              | Mean | 0.24  | 0.08  | 0.02   | 0.20 | 0.01  | 0.40  | 0      | 0.04 | 0            | 0        | 0        | 0         | 0     |
|                   | ( <i>n</i> = 65)  | SE   | 0.02  | 0.02  | 0.01   | 0.02 | 0.01  | 0.03  | 0      | 0.01 | 0            | 0        | 0        | 0         | 0     |
| Arable            | All               | Mean | 0.03  | 0.03  | 0      | 0.01 | 0.02  | 0.27  | 0      | 0.55 | 0            | 0.03     | 0        | 0         | 0.06  |
|                   | ( <i>n</i> = 23)  | SE   | 0.02  | 0.02  | 0      | 0.01 | 0.01  | 0.07  | 0      | 0.08 | 0            | 0.03     | 0        | 0         | 0.04  |
|                   | Random            | Mean | 0.02  | 0.03  | 0      | 0.01 | 0.02  | 0.26  | 0      | 0.60 | 0            | 0        | 0        | 0         | 0.06  |
|                   | ( <i>n</i> = 21)  | SE   | 0.01  | 0.02  | 0      | 0.01 | 0.01  | 0.07  | 0      | 0.08 | 0            | 0        | 0        | 0         | 0.05  |
|                   | Rest              | Mean | 0.18  | 0     | 0      | 0    | 0     | 0.38  | 0      | 0    | 0            | 0.40     | 0        | 0         | 0.05  |
|                   | ( <i>n</i> = 2)   | SE   | 0.08  | 0     | 0      | 0    | 0     | 0.38  | 0      | 0    | 0            | 0.40     | 0        | 0         | 0.05  |
| Orchard           | All               | Mean | 0.26  | 0.01  | 0      | 0.01 | 0.04  | 0.63  | 0      | 0.06 | 0            | 0        | 0        | 0         | 0     |
|                   | ( <i>n</i> = 255) | SE   | 0.01  | 0     | 0      | 0    | 0.01  | 0.01  | 0      | 0.01 | 0            | 0        | 0        | 0         | 0     |
|                   | Random            | Mean | 0.26  | 0     | 0      | 0    | 0.03  | 0.64  | 0      | 0.06 | 0            | 0        | 0        | 0         | 0     |
|                   | ( <i>n</i> = 208) | SE   | 0     | 0     | 0      | 0    | 0.01  | 0.01  | 0      | 0.01 | 0            | 0        | 0        | 0         | 0     |
|                   | Rest              | Mean | 0.26  | 0.03  | 0      | 0.03 | 0.08  | 0.57  | 0      | 0.03 | 0            | 0        | 0        | 0         | 0     |
|                   | ( <i>n</i> = 47)  | SE   | 0.02  | 0.02  | 0      | 0.02 | 0.03  | 0.04  | 0      | 0.01 | 0            | 0        | 0        | 0         | 0     |
| Pine              | All               | Mean | 0.38  | 0.08  | 0.01   | 0.17 | 0     | 0.29  | 0      | 0.08 | 0            | 0        | 0        | 0         | 0     |
|                   | ( <i>n</i> = 8)   | SE   | 0.05  | 0.04  | 0.01   | 0.07 | 0     | 0.10  | 0      | 0.05 | 0            | 0        | 0        | 0         | 0     |
|                   | Random            | Mean | 0.50  | 0     | 0      | 0    | 0     | 0.30  | 0      | 0.20 | 0            | 0        | 0        | 0         | 0     |
|                   | ( <i>n</i> = 1)   | SE   | -     | -     | -      | -    | -     | -     | -      | -    | -            | -        | -        | -         | -     |
|                   | Rest              | Mean | 0.36  | 0.09  | 0.01   | 0.19 | 0     | 0.29  | 0      | 0.06 | 0            | 0        | 0        | 0         | 0     |
|                   | ( <i>n</i> = 7)   | SE   | 0.05  | 0.05  | 0.01   | 0.07 | 0     | 0.11  | 0      | 0.06 | 0            | 0        | 0        | 0         | 0     |
| Bamboo            | All               | Mean | 0.01  | 0.01  | 0.57   | 0.02 | 0     | 0.09  | 0      | 0.30 | 0            | 0        | 0        | 0         | 0     |
|                   | ( <i>n</i> = 9)   | SE   | 0.01  | 0.01  | 0.04   | 0.02 | 0     | 0.02  | 0      | 0.06 | 0            | 0        | 0        | 0         | 0     |

|                     |                           |      |      |      |      |      |      |      |      |      |      |   |   |   |   |
|---------------------|---------------------------|------|------|------|------|------|------|------|------|------|------|---|---|---|---|
|                     | Random<br>( <i>n</i> = 3) | Mean | 0    | 0.02 | 0.63 | 0    | 0    | 0.08 | 0    | 0.27 | 0    | 0 | 0 | 0 | 0 |
|                     |                           | SE   | 0    | 0.02 | 0.09 | 0    | 0    | 0.02 | 0    | 0.09 | 0    | 0 | 0 | 0 | 0 |
|                     | Rest<br>( <i>n</i> = 6)   | Mean | 0.01 | 0.01 | 0.54 | 0.03 | 0    | 0.09 | 0    | 0.32 | 0    | 0 | 0 | 0 | 0 |
|                     |                           | SE   | 0.01 | 0.01 | 0.05 | 0.02 | 0    | 0.02 | 0    | 0.07 | 0    | 0 | 0 | 0 | 0 |
| Forest              | All                       | Mean | 0.25 | 0.11 | 0.10 | 0.19 | 0    | 0.27 | 0.01 | 0.07 | 0    | 0 | 0 | 0 | 0 |
|                     | ( <i>n</i> = 882)         | SE   | 0.01 | 0    | 0    | 0.01 | 0    | 0.01 | 0    | 0    | 0    | 0 | 0 | 0 | 0 |
|                     | Random                    | Mean | 0.26 | 0.09 | 0.13 | 0.12 | 0    | 0.28 | 0    | 0.11 | 0    | 0 | 0 | 0 | 0 |
|                     | ( <i>n</i> = 264)         | SE   | 0.01 | 0.01 | 0.01 | 0.01 | 0    | 0.01 | 0    | 0.01 | 0    | 0 | 0 | 0 | 0 |
|                     | Rest                      | Mean | 0.24 | 0.12 | 0.09 | 0.22 | 0.01 | 0.26 | 0.01 | 0.06 | 0    | 0 | 0 | 0 | 0 |
|                     | ( <i>n</i> = 618)         | SE   | 0.01 | 0    | 0.01 | 0.01 | 0    | 0.01 | 0    | 0    | 0    | 0 | 0 | 0 | 0 |
| Riverbed            | All                       | Mean | 0.01 | 0.02 | 0    | 0.28 | 0.06 | 0.08 | 0.11 | 0.44 | 0    | 0 | 0 | 0 | 0 |
|                     | ( <i>n</i> = 77)          | SE   | 0    | 0.01 | 0    | 0.04 | 0.02 | 0.02 | 0.03 | 0.05 | 0    | 0 | 0 | 0 | 0 |
|                     | Random                    | Mean | 0    | 0    | 0    | 0.11 | 0.03 | 0.03 | 0.14 | 0.69 | 0    | 0 | 0 | 0 | 0 |
|                     | ( <i>n</i> = 44)          | SE   | 0    | 0    | 0    | 0.04 | 0.01 | 0.01 | 0.04 | 0.06 | 0    | 0 | 0 | 0 | 0 |
|                     | Rest                      | Mean | 0.03 | 0.05 | 0    | 0.49 | 0.09 | 0.15 | 0.07 | 0.12 | 0    | 0 | 0 | 0 | 0 |
|                     | ( <i>n</i> = 33)          | SE   | 0.01 | 0.01 | 0    | 0.06 | 0.04 | 0.03 | 0.03 | 0.05 | 0    | 0 | 0 | 0 | 0 |
| Riverine<br>habitat | All                       | Mean | 0.17 | 0.04 | 0    | 0.51 | 0.09 | 0.10 | 0.04 | 0.04 | 0.01 | 0 | 0 | 0 | 0 |
|                     | ( <i>n</i> = 648)         | SE   | 0.01 | 0    | 0    | 0.01 | 0.01 | 0.01 | 0    | 0    | 0    | 0 | 0 | 0 | 0 |
|                     | Random                    | Mean | 0.13 | 0.02 | 0    | 0.68 | 0.04 | 0.06 | 0.01 | 0.06 | 0    | 0 | 0 | 0 | 0 |
|                     | ( <i>n</i> = 108)         | SE   | 0.02 | 0.01 | 0    | 0.03 | 0.01 | 0.01 | 0    | 0.01 | 0    | 0 | 0 | 0 | 0 |
|                     | Rest                      | Mean | 0.18 | 0.04 | 0    | 0.48 | 0.10 | 0.11 | 0.05 | 0.03 | 0.01 | 0 | 0 | 0 | 0 |
|                     | ( <i>n</i> = 540)         | SE   | 0.01 | 0    | 0    | 0.01 | 0.01 | 0.01 | 0    | 0    | 0    | 0 | 0 | 0 | 0 |
| Unused land         | All                       | Mean | 0.12 | 0.07 | 0.02 | 0.45 | 0.01 | 0.28 | 0.01 | 0.03 | 0    | 0 | 0 | 0 | 0 |
|                     | ( <i>n</i> = 275)         | SE   | 0.01 | 0.01 | 0    | 0.02 | 0    | 0.01 | 0    | 0.01 | 0    | 0 | 0 | 0 | 0 |
|                     | Random                    | Mean | 0.15 | 0.02 | 0.04 | 0.24 | 0.02 | 0.40 | 0    | 0.13 | 0    | 0 | 0 | 0 | 0 |
|                     | ( <i>n</i> = 38)          | SE   | 0.03 | 0.01 | 0.02 | 0.05 | 0.02 | 0.05 | 0    | 0.04 | 0    | 0 | 0 | 0 | 0 |
|                     | Rest                      | Mean | 0.12 | 0.08 | 0.01 | 0.49 | 0.01 | 0.26 | 0.01 | 0.02 | 0    | 0 | 0 | 0 | 0 |
|                     | ( <i>n</i> = 237)         | SE   | 0.01 | 0.01 | 0    | 0.02 | 0    | 0.01 | 0    | 0    | 0    | 0 | 0 | 0 | 0 |

**Table S3.** Overview of occurrence and abundance of the leopard cat's main prey species at leopard cat trap locations at the interface of natural habitat and orchards in the farmland, and natural habitat along the Da'an river.

|                     |                   | <b>Farmland<sup>1</sup></b>        |                               | <b>River<sup>2</sup></b>           |                               |
|---------------------|-------------------|------------------------------------|-------------------------------|------------------------------------|-------------------------------|
|                     | <b>Species</b>    | <b>Percentage of traps visited</b> | <b>Visits/100 trap nights</b> | <b>Percentage of traps visited</b> | <b>Visits/100 trap nights</b> |
| Murids              | Shrews            | 0                                  | 0                             | 10.0                               | 0.7                           |
|                     | Mice              | 20.0                               | 0.3                           | 70.0                               | 14.3                          |
|                     | Rats              | 40.0                               | 1.2                           | 20.0                               | 2.1                           |
|                     | <b>Total</b>      | <b>60.0</b>                        | <b>1.6</b>                    | <b>100</b>                         | <b>17.0</b>                   |
| Other small mammals | Hares             | 0                                  | 0                             | 10.0                               | 0.1                           |
|                     | Squirrels         | 20.0                               | 0.2                           | 0                                  | 0                             |
|                     | <b>Total</b>      | <b>20.0</b>                        | <b>0.2</b>                    | <b>10.0</b>                        | <b>0.1</b>                    |
| Birds               | Doves             | 66.7                               | 6.7                           | 40.0                               | 8.3                           |
|                     | Hwameis           | 33.3                               | 8.8                           | 30.0                               | 7.4                           |
|                     | Magpies           | 26.7                               | 0.6                           | 20.0                               | 0.3                           |
|                     | Partridges        | 33.3                               | 1.4                           | 20.0                               | 1.6                           |
|                     | Pheasants         | 20.0                               | 0.2                           | 0                                  | 0                             |
|                     | Quails            | 0                                  | 0                             | 40.0                               | 5.0                           |
|                     | Small birds other | 66.7                               | 4.0                           | 80.0                               | 5.3                           |
|                     | <b>Total</b>      | <b>86.7</b>                        | <b>21.7</b>                   | <b>100</b>                         | <b>27.9</b>                   |

<sup>1</sup>Number of traps in the farmland was 15, number of trap nights 1857 (Van der Meer *et al.*, 2022)

<sup>2</sup>Number of traps along the river was 10, number of trap nights 1050 (Van der Meer *et al.*, 2022)

Van der Meer, E.; Dullemeier, H.; Chen, W.L.; Chang, A.M.; Chen, C.C.; Pei, K.J.C.; Lai, Y.C. Live capture and handling of Taiwanese leopard cats (*Prionailurus bengalensis*): an evaluation of trap designs and capture protocols. *Wildl. Biol.* **2022**, *4*, e01032. doi: 10.1002/wlb3.01032.

**Table S4.** Mean proportions of vegetation and other ground cover types in the riverbed and riverine habitat of the Da'an river in which the river leopard cats reside versus the rivers in the mountainous agricultural area in which the mountain leopard cats reside at all locations (random + resting), random points and daytime resting sites (Rest).

|                                                |           |      | Trees | Shrub | Bamboo | Reed | Grass | Herbs | Stones | Bare | River blocks | Building | Tar road | Dirt road | Other |
|------------------------------------------------|-----------|------|-------|-------|--------|------|-------|-------|--------|------|--------------|----------|----------|-----------|-------|
| Riverbed Da'an river                           | All       | Mean | 0     | 0     | 0      | 0.10 | 0.06  | 0.04  | 0.16   | 0.64 | 0            | 0        | 0        | 0         | 0     |
|                                                | (n = 51)  | SE   | 0     | 0     | 0      | 0.03 | 0.02  | 0.01  | 0.04   | 0.06 | 0            | 0        | 0        | 0         | 0     |
|                                                | Random    | Mean | 0     | 0     | 0      | 0.10 | 0.03  | 0.01  | 0.15   | 0.70 | 0            | 0        | 0        | 0         | 0     |
|                                                | (n = 41)  | SE   | 0     | 0     | 0      | 0.04 | 0.02  | 0.01  | 0.05   | 0.06 | 0            | 0        | 0        | 0         | 0     |
|                                                | Rest      | Mean | 0.01  | 0.02  | 0      | 0.10 | 0.20  | 0.14  | 0.18   | 0.36 | 0            | 0        | 0        | 0         | 0     |
|                                                | (n = 10)  | SE   | 0.01  | 0.02  | 0      | 0.05 | 0.07  | 0.05  | 0.10   | 0.14 | 0            | 0        | 0        | 0         | 0     |
| Riverbed mountainous agricultural area         | All       | Mean | 0.03  | 0.05  | 0      | 0.63 | 0.04  | 0.16  | 0.02   | 0.08 | 0            | 0        | 0        | 0         | 0     |
|                                                | (n = 26)  | SE   | 0.01  | 0.02  | 0      | 0.05 | 0.04  | 0.03  | 0.01   | 0.04 | 0            | 0        | 0        | 0         | 0     |
|                                                | Random    | Mean | 0     | 0     | 0      | 0.30 | 0     | 0.17  | 0      | 0.53 | 0            | 0        | 0        | 0         | 0     |
|                                                | (n = 3)   | SE   | 0     | 0     | 0      | 0.25 | 0     | 0.09  | 0      | 0.17 | 0            | 0        | 0        | 0         | 0     |
|                                                | Rest      | Mean | 0.04  | 0.06  | 0      | 0.67 | 0.04  | 0.16  | 0.02   | 0.02 | 0            | 0        | 0        | 0         | 0     |
|                                                | (n = 23)  | SE   | 0.01  | 0.02  | 0      | 0.05 | 0.04  | 0.03  | 0.01   | 0.02 | 0            | 0        | 0        | 0         | 0     |
| Riverine Da'an river                           | All       | Mean | 0.18  | 0.04  | 0      | 0.51 | 0.09  | 0.10  | 0.04   | 0.04 | 0.01         | 0        | 0        | 0         | 0     |
|                                                | (n = 643) | SE   | 0.01  | 0     | 0      | 0.01 | 0.01  | 0.01  | 0      | 0    | 0            | 0        | 0        | 0         | 0     |
|                                                | Random    | Mean | 0.13  | 0.02  | 0      | 0.68 | 0.03  | 0.06  | 0.01   | 0.06 | 0            | 0        | 0        | 0         | 0     |
|                                                | (n = 107) | SE   | 0.02  | 0.01  | 0      | 0.03 | 0.01  | 0.01  | 0      | 0.01 | 0            | 0        | 0        | 0         | 0     |
|                                                | Rest      | Mean | 0.18  | 0.04  | 0      | 0.48 | 0.10  | 0.10  | 0.05   | 0.03 | 0.01         | 0        | 0        | 0         | 0     |
|                                                | (n = 536) | SE   | 0.01  | 0     | 0      | 0.01 | 0.01  | 0.01  | 0      | 0    | 0            | 0        | 0        | 0         | 0     |
| Riverine habitat mountainous agricultural area | All       | Mean | 0     | 0.02  | 0      | 0.62 | 0.14  | 0.22  | 0      | 0    | 0            | 0        | 0        | 0         | 0     |
|                                                | (n = 5)   | SE   | 0     | 0.02  | 0      | 0.12 | 0.14  | 0.10  | 0      | 0    | 0            | 0        | 0        | 0         | 0     |
|                                                | Random    | Mean | 0     | 0     | 0      | 0.30 | 0.70  | 0     | 0      | 0    | 0            | 0        | 0        | 0         | 0     |
|                                                | (n = 1)   | SE   | -     | -     | -      | -    | -     | -     | -      | -    | -            | -        | -        | -         | -     |
|                                                | Rest      | Mean | 0     | 0.03  | 0      | 0.70 | 0     | 0.28  | 0      | 0    | 0            | 0        | 0        | 0         | 0     |
|                                                | (n = 4)   | SE   | 0     | 0.03  | 0      | 0.11 | 0     | 0.11  | 0      | 0    | 0            | 0        | 0        | 0         | 0     |

**Figure S1.** Examples of leopard cat daytime resting sites within land use subclasses commonly selected by the studied individuals ( $n \geq 3$ ): (a) Riverine habitat, (b) Unused land, (c) Forest, (d) Riverbed and (e) Abandoned orchard (*photo credit*: Esther van der Meer).

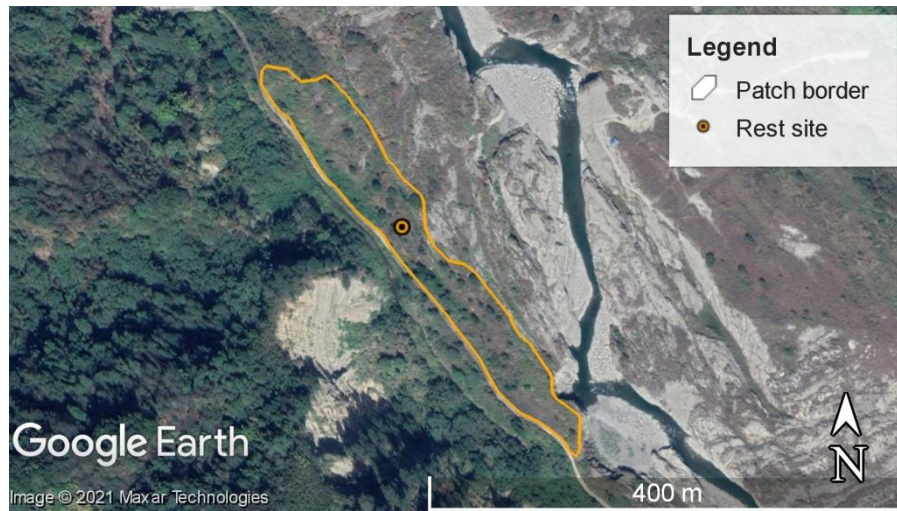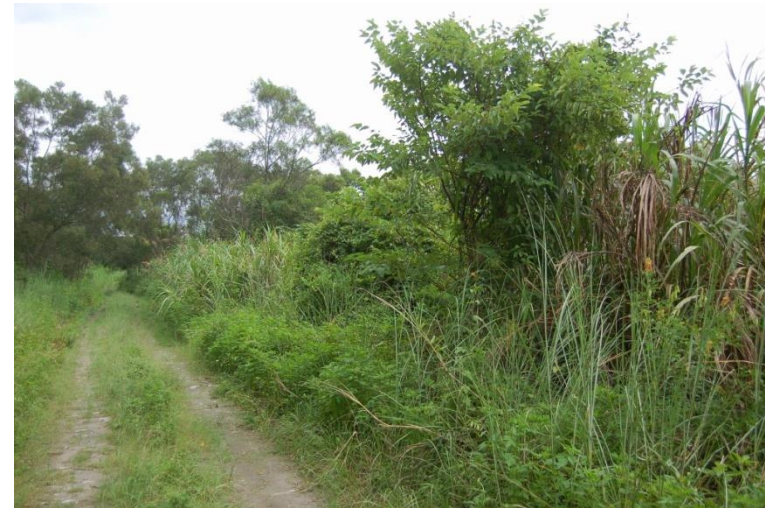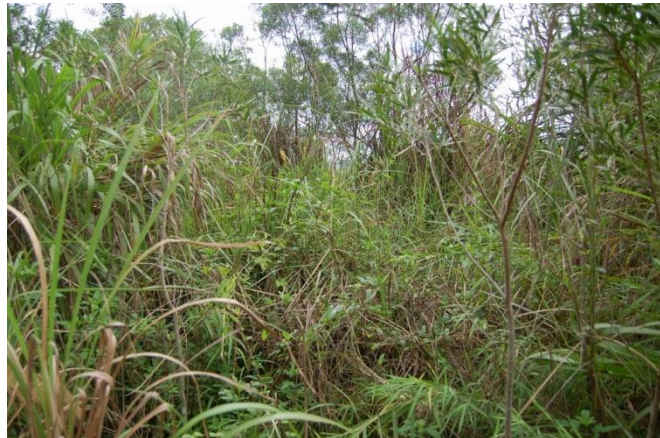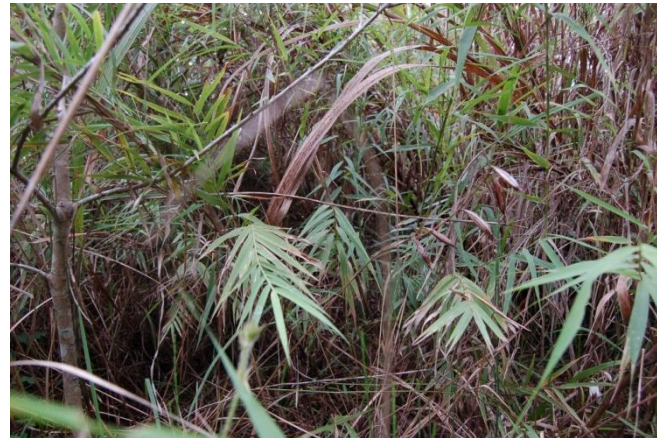

(a) Riverine habitat

From left to right:  
 Location  
 Street view  
 Vegetation  
 Ground cover

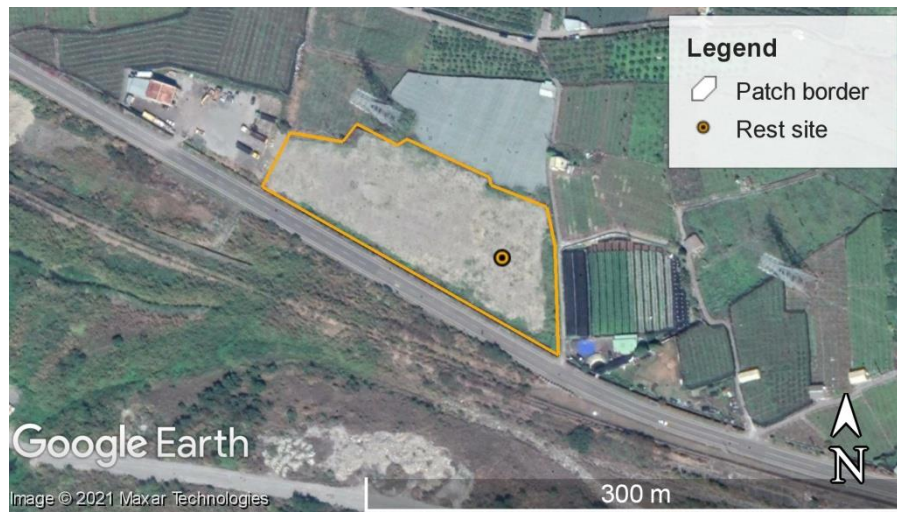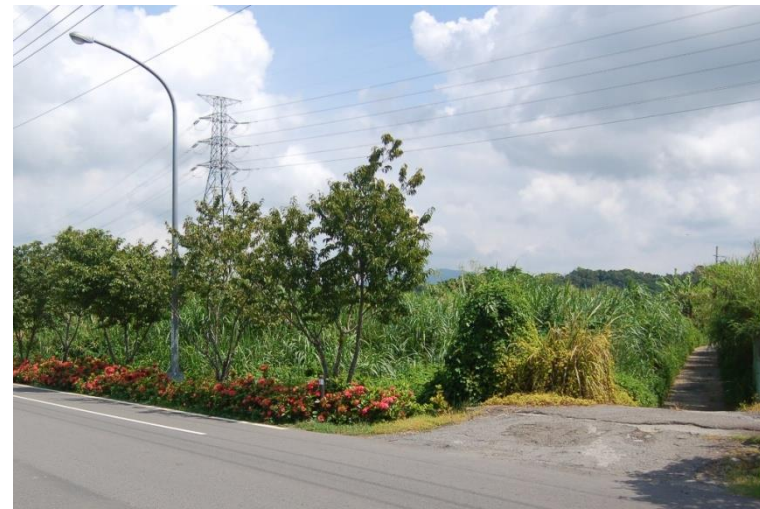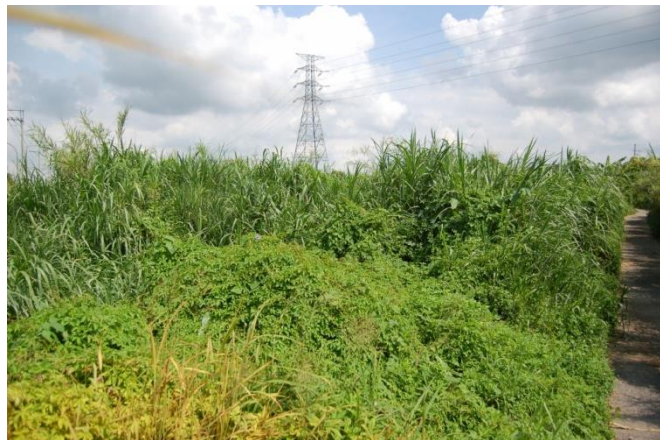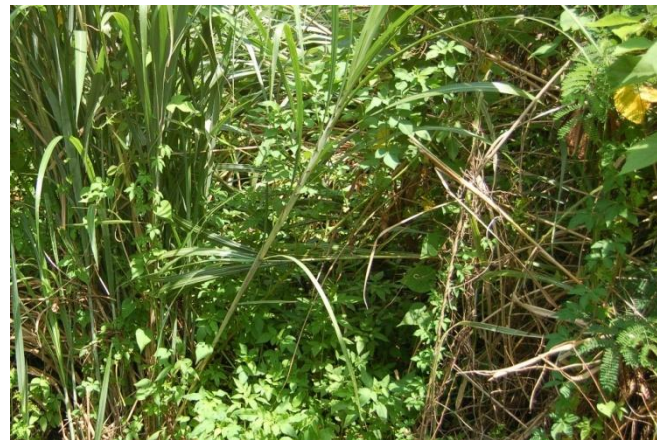

(b) Unused land

From left to right:  
 Location  
 Street view  
 Vegetation  
 Ground cover

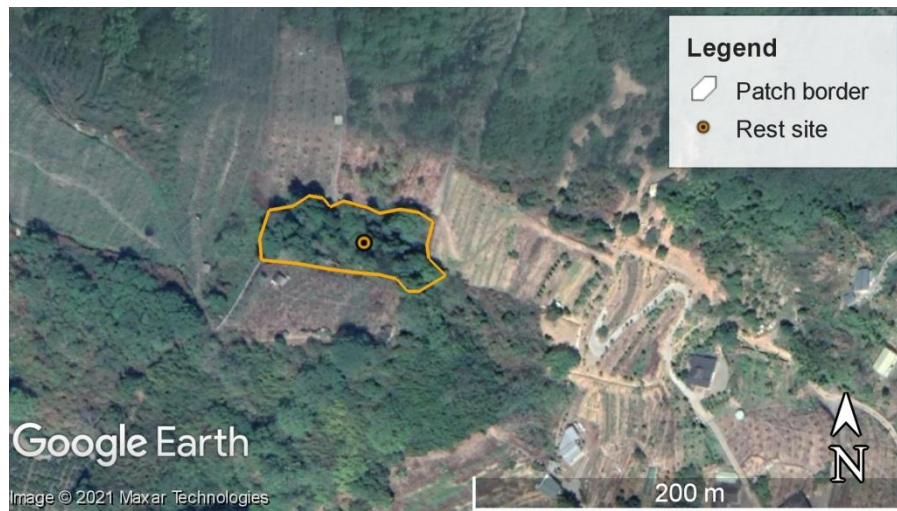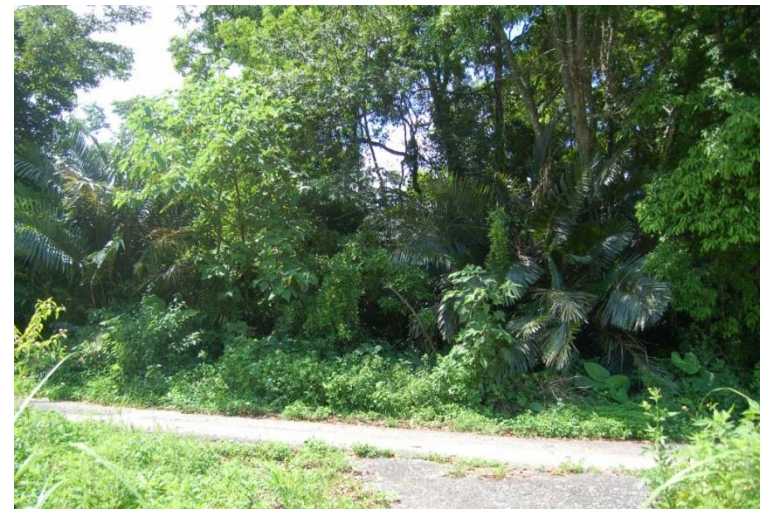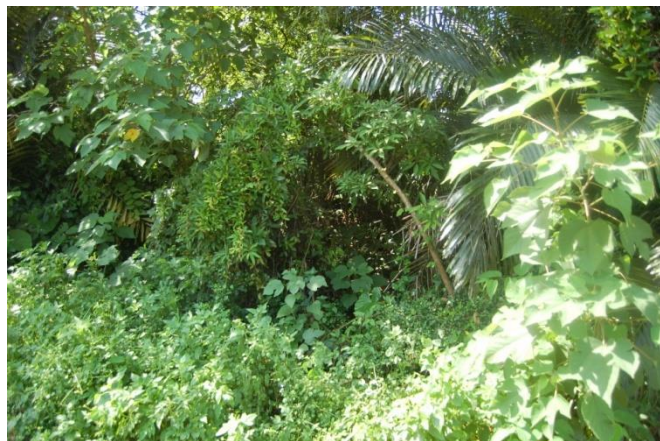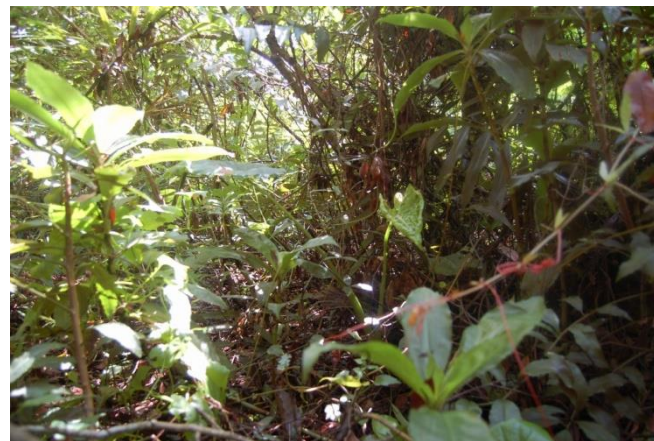

(c) Forest

From left to right:  
 Location  
 Street view  
 Vegetation  
 Ground cover

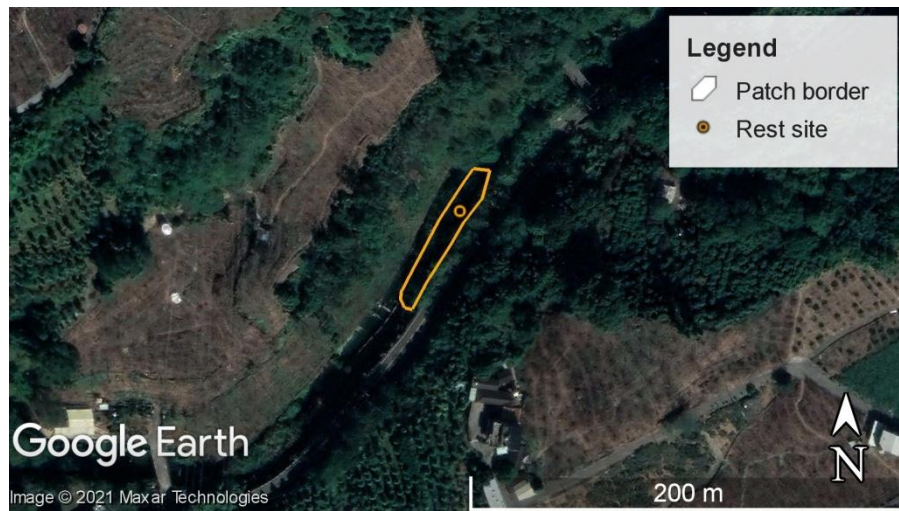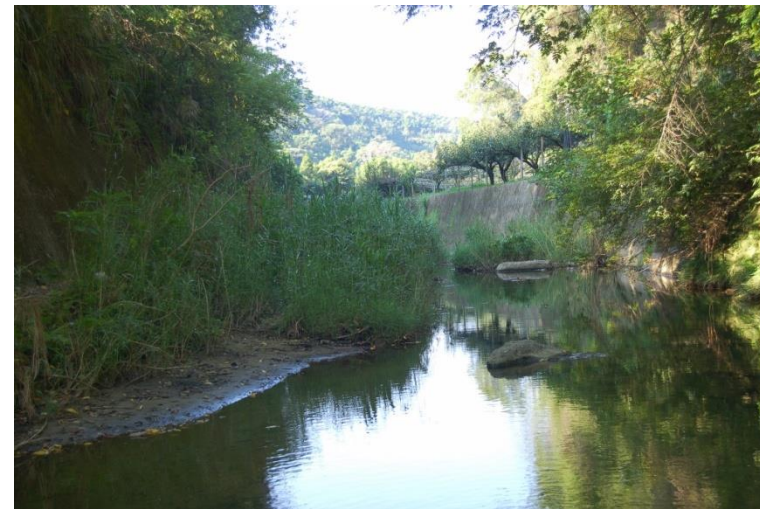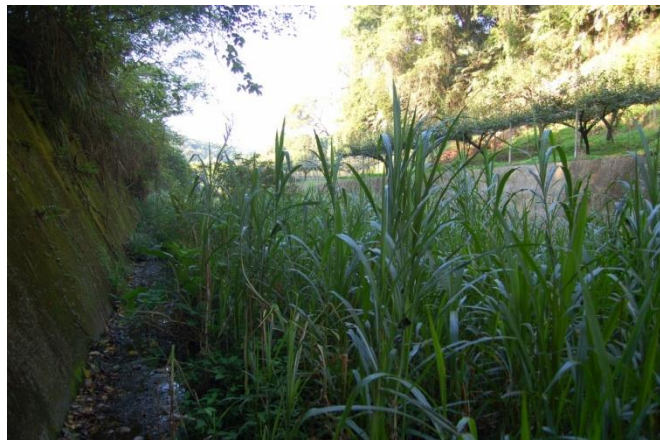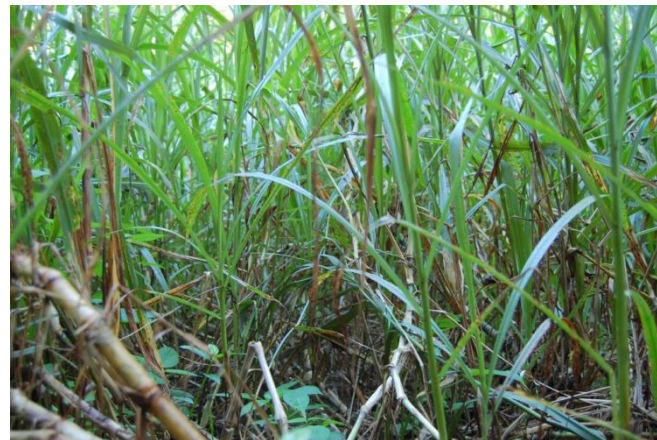

(d) Riverbed

From left to right:  
 Location  
 Street view  
 Vegetation  
 Ground cover

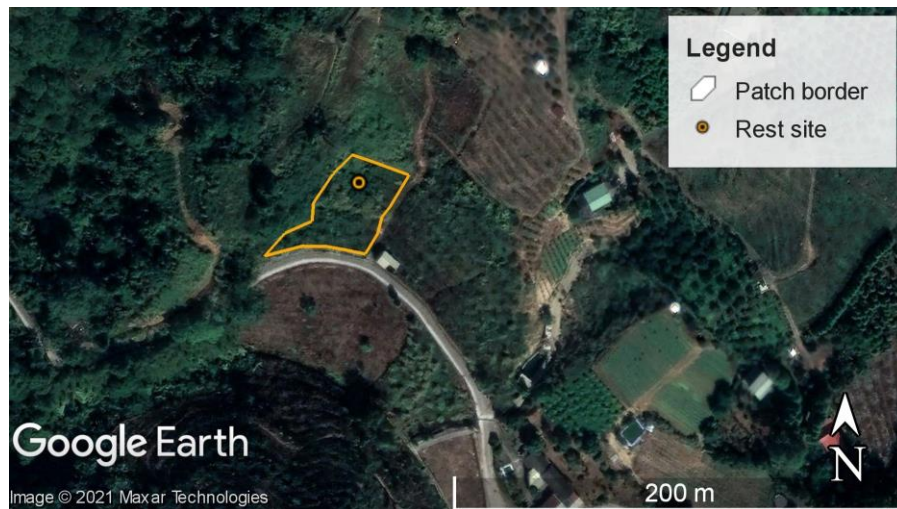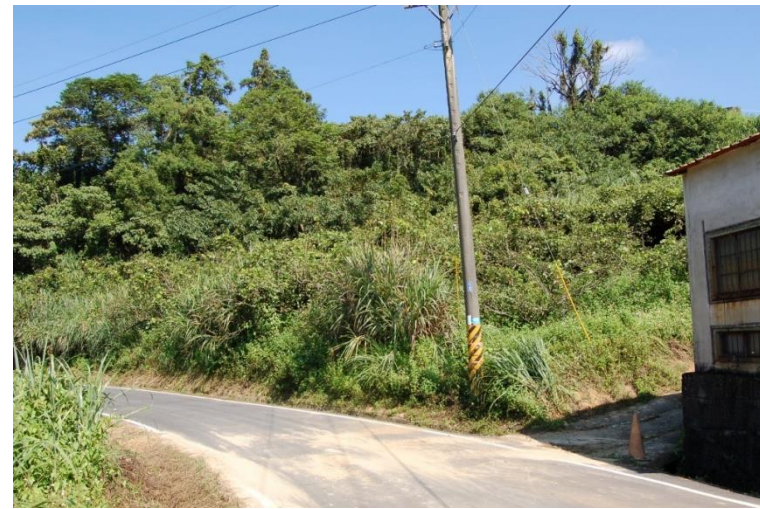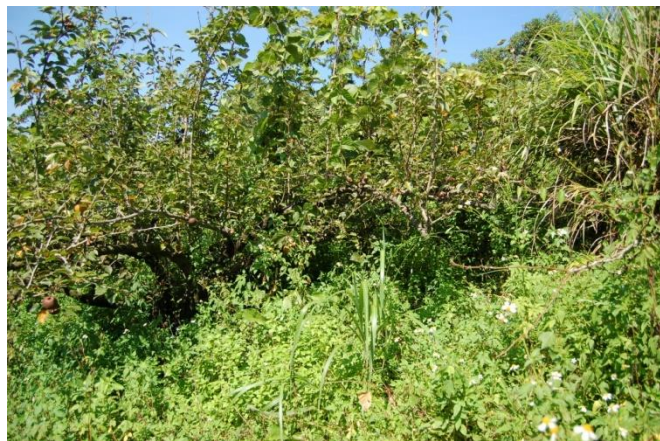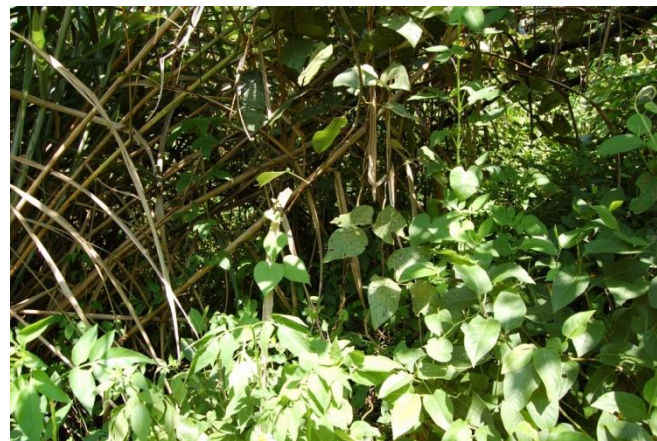

(e) Abandoned orchard

From left to right:  
 Location  
 Street view  
 Vegetation  
 Ground cover

**Figure S2.** Example of a semi-natural leopard cat daytime resting site consisting of concrete river blocks used by Taiwan’s River Authority to manage flood water (*photo credit: Esther van der Meer*)

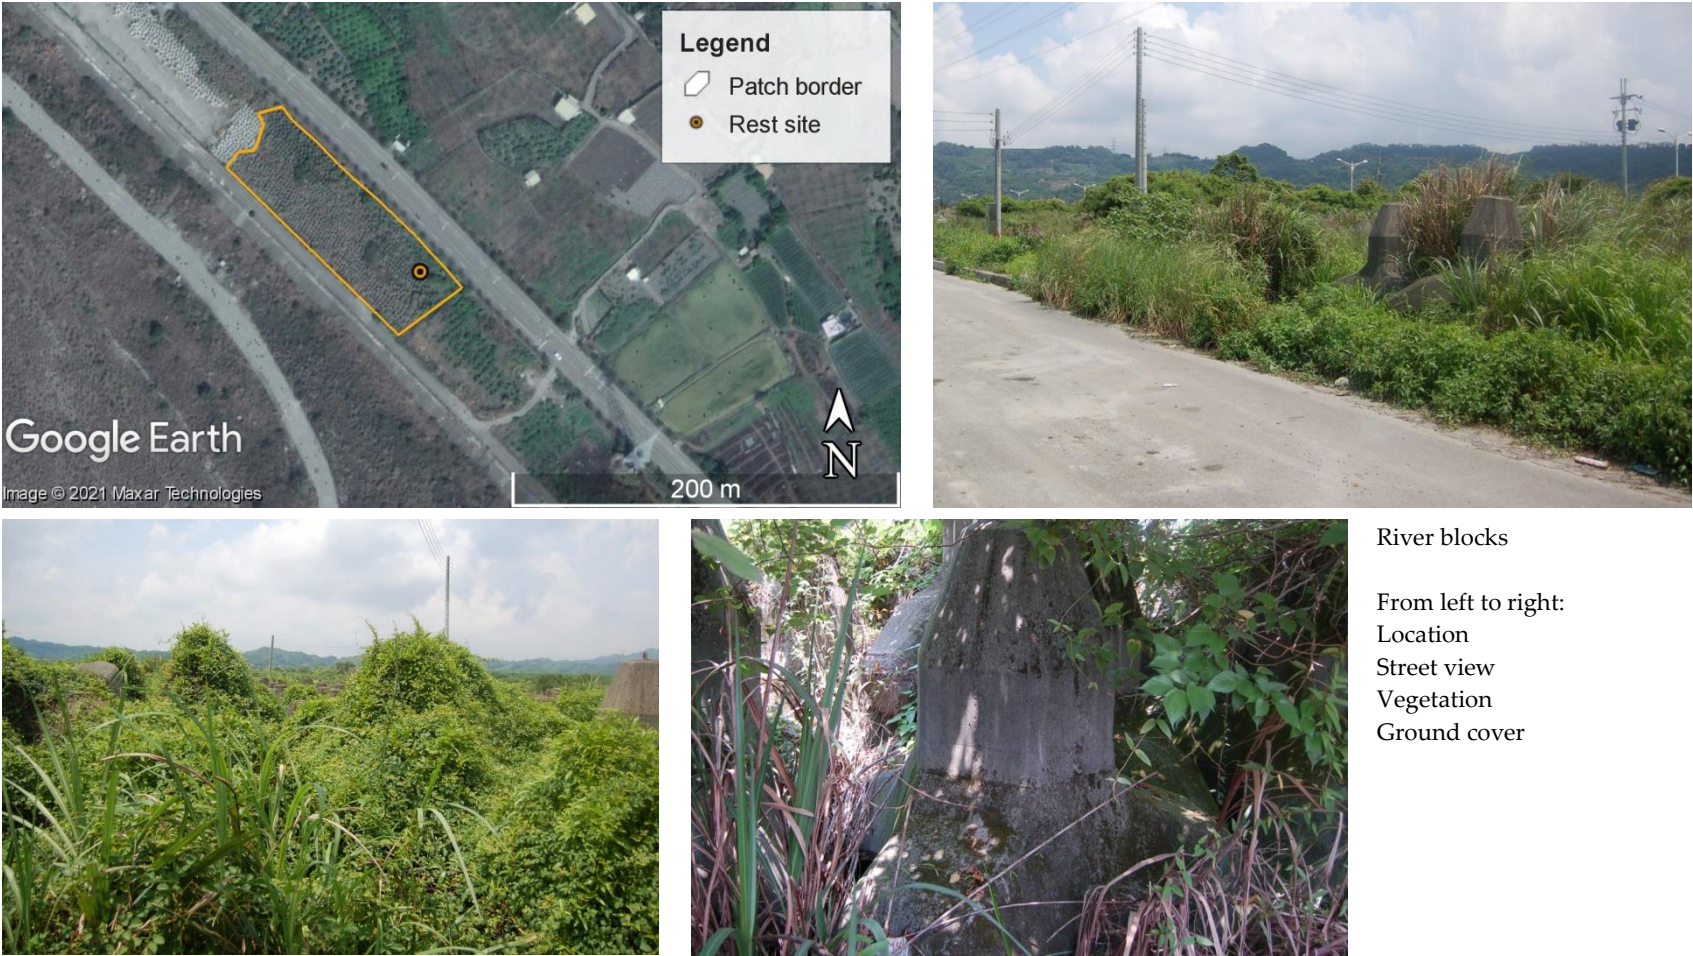

**Figure S3.** Comparison of the riverbeds for river and mountain leopard cats: the riverbed, flanked by riverine habitat, of the Da'an river which runs through the home ranges of the river cats (a) versus the riverbed of the rivers which run through the mountainous agricultural area in which the mountain cats reside (b) (*photo credit*: Esther van der Meer)

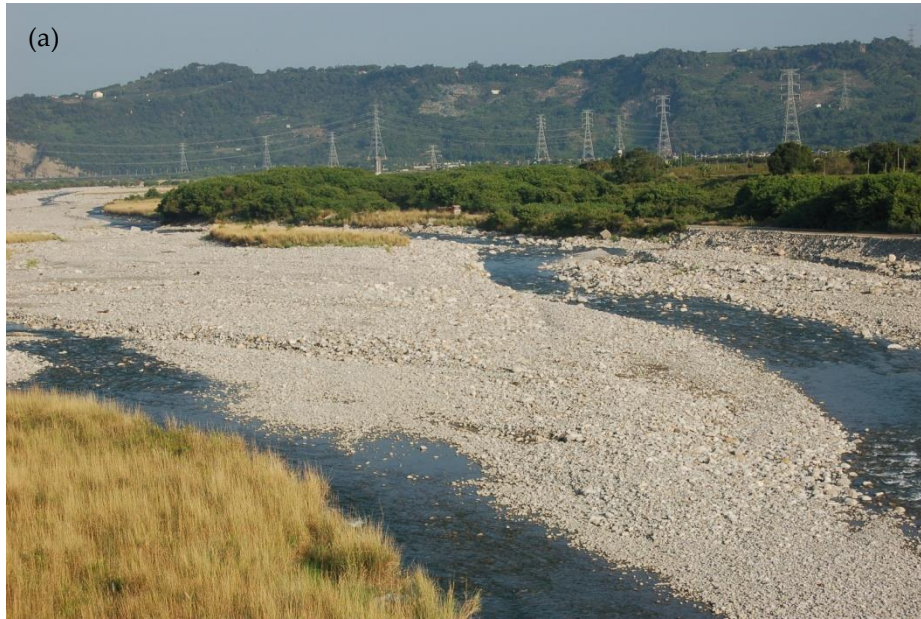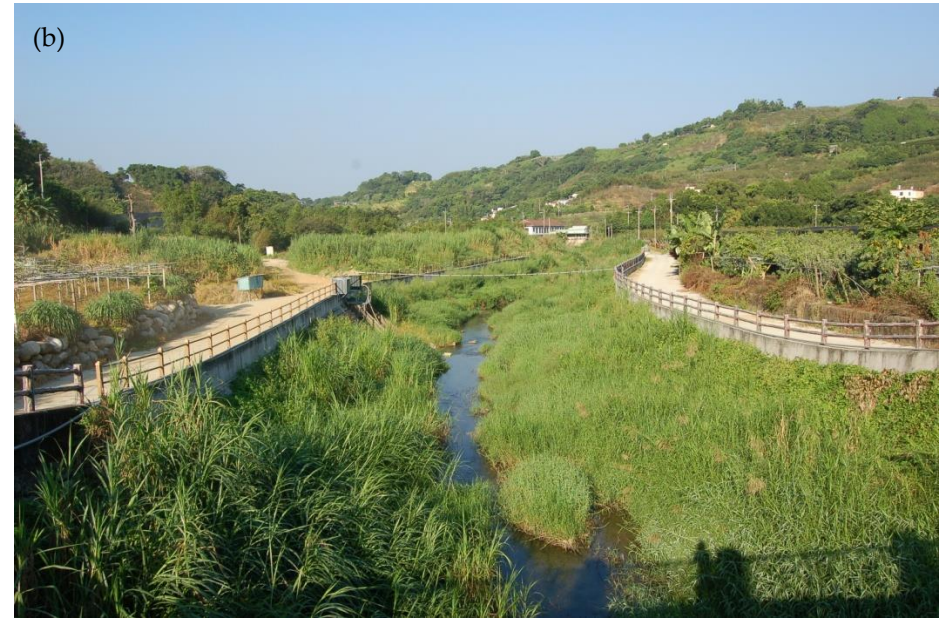

Supplement: s1 [file s1]
